# Supplementary material for: Steric effect on excimer formation in planar Pt(ii) complexes
Source: Royal Society of Chemistry journal article supplement (doi:10.1039/c6cp08651a), 2017-01-01
Supplement: c6cp08651a1.pdf [file c6cp08651a1.pdf]

## Steric effect on excimer formation in planar Pt(II) complexes

Yang-Jin Cho,<sup>a</sup> So-Yoen Kim,<sup>a</sup> Ho-Jin Son,<sup>a\*</sup> Dae Won Cho,<sup>ab\*</sup> and Sang Ook Kang<sup>a\*</sup>

<sup>a</sup>Department of Advanced Materials Chemistry, Korea University (Sejong), Sejong, 30019, South Korea. E-mail: [sangok@korea.ac.kr](mailto:sangok@korea.ac.kr)

<sup>b</sup>Center for Photovoltaic Materials, Korea University (Sejong), Sejong, 30019, South Korea. E-mail: [dwcho@korea.ac.kr](mailto:dwcho@korea.ac.kr)

### Figures

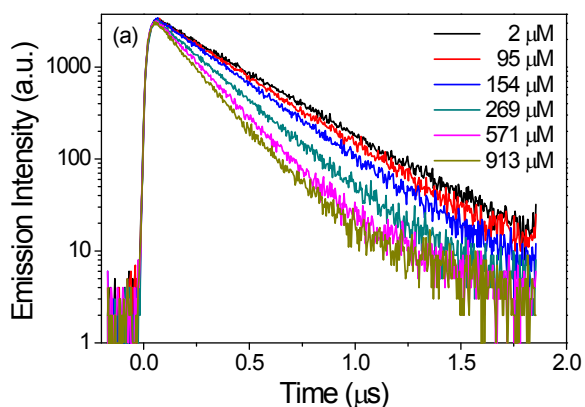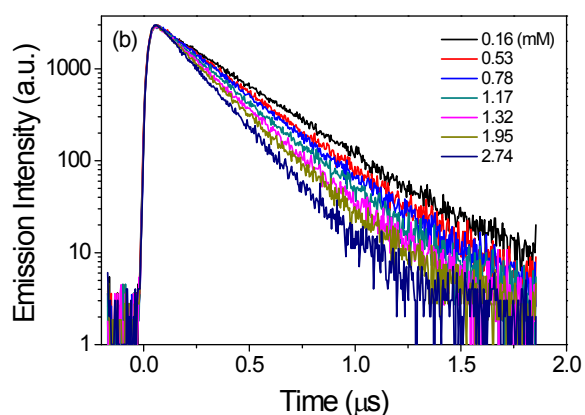

Fig. S1 Decay profiles of (a) Pt-1, and (b) Pt-3 in CH<sub>2</sub>Cl<sub>2</sub> at 300 K.  $\lambda_{ex}$  is 330 nm. Monitoring wavelength is 480 nm.

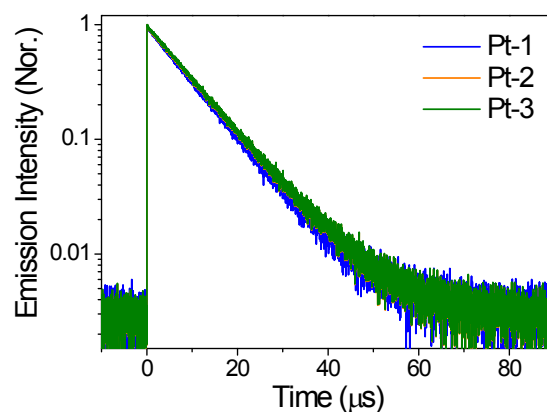

Fig. S2 Decay profiles of Pt-1, Pt-2 and Pt-3 in MTHF at 77 K.  $\lambda_{ex}$  is 309 nm. Monitoring wavelength is 480 nm.

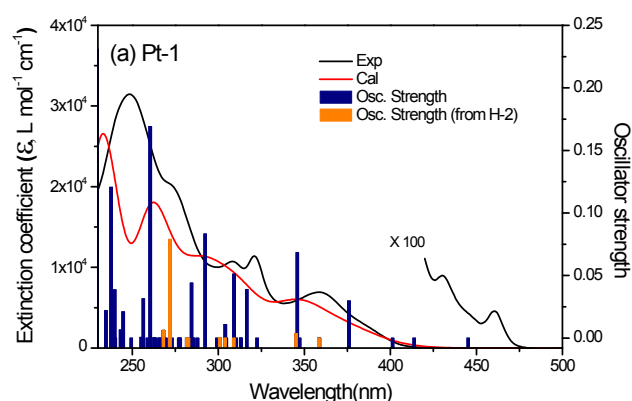

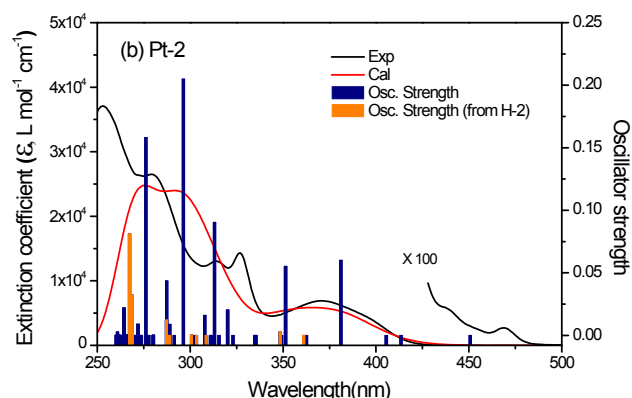

**Fig. S2** Simulated absorption spectra of (a) Pt-1 and (b) Pt-2 using a TD-DFT with full width at half-maximum of  $3000\text{ cm}^{-1}$  (red line) and experimental absorption spectra (black line). The vertical bars correspond to the individual transitions to excited states. Especially, the yellow colored vertical bars indicate the transitions from H-2.

## Tables

**Table S1.** Energies (eV) of orbitals calculated by B2LYP method<sup>a</sup> for Pt-1, Pt-2 and Pt-3

|      | Pt-1   | Pt-2   | Pt-3   |
|------|--------|--------|--------|
| L+2  | -0.972 | -0.948 | -0.974 |
| L+1  | -1.138 | -1.120 | -1.138 |
| LUMO | -1.714 | -1.688 | -1.711 |
| HOMO | -5.717 | -5.628 | -5.723 |
| H-1  | -5.963 | -5.872 | -5.965 |
| H-2  | -6.218 | -6.130 | -6.234 |

<sup>a</sup> The 6-31G(d,p) and LanL2dz basis sets were applied for non-metal atoms and platinum, respectively.

**Table S2** Calculated transitions for Pt-1 at optimized geometry. The lower energy triplet- and the intense singlet-transitions are selected among 60-transitions

| No. | Wavelength (nm) | Osc. Strength | Symmetry         | Major contribs                                                  |
|-----|-----------------|---------------|------------------|-----------------------------------------------------------------|
| 1   | 445.2           | 0.0           | Triplet-A        | H-1→LUMO (54%), HOMO→LUMO (27%)                                 |
| 2   | 413.8           | 0.0           | Triplet-A        | H-1→L+1 (-16%), HOMO→LUMO (14%), HOMO→L+1 (36%), HOMO→L+2 (10%) |
| 3   | 401.3           | 0.0           | Triplet-A        | H-1→LUMO (-14%), HOMO→LUMO (53%)                                |
| 4   | 375.9           | 0.0296        | Singlet-A        | H-1→LUMO (19%), HOMO→LUMO (76%)                                 |
| 8   | 346.0           | 0.0683        | Singlet-A        | H-1→LUMO (73%), HOMO→LUMO (-21%)                                |
| 9   | <b>345.2</b>    | <b>0.0036</b> | <b>Singlet-A</b> | <b>H-2→LUMO (99%)</b>                                           |
| 11  | 316.5           | 0.0389        | Singlet-A        | HOMO→L+1 (92%)                                                  |
| 15  | 309.1           | 0.0511        | Singlet-A        | H-3→LUMO (54%), H-1→L+1 (-12%), H-1→L+2 (11%), HOMO→L+2 (16%)   |
| 18  | 304.0           | 0.0109        | Singlet-A        | H-3→LUMO (-11%), HOMO→L+2 (80%)                                 |
| 20  | <b>300.8</b>    | <b>0.0002</b> | <b>Singlet-A</b> | <b>H-2→L+1 (86%), H-2→L+2 (13%)</b>                             |
| 22  | 292.3           | 0.0832        | Singlet-A        | H-3→LUMO (11%), H-1→L+1 (75%)                                   |
| 26  | 284.4           | 0.0439        | Singlet-A        | H-4→LUMO (39%), H-3→LUMO (-11%), H-1→L+2 (45%)                  |
| 28  | <b>281.6</b>    | <b>0.0001</b> | <b>Singlet-A</b> | <b>H-2→L+1 (-14%), H-2→L+2 (82%)</b>                            |
| 33  | 271.8           | 0.0789        | Singlet-A        | H-4→LUMO (28%), H-3→L+1 (28%), H-2→L+3 (18%), H-1→L+2 (-17%)    |
| 36  | 268.1           | 0.0062        | Singlet-A        | H-3→L+1 (-18%), H-2→L+3 (69%)                                   |
| 40  | 262.8           | 0.0004        | Singlet-A        | H-6→LUMO (60%), H-6→L+1 (18%), H-5→L+1 (11%)                    |
| 42  | 260.4           | 0.1691        | Singlet-A        | H-4→LUMO (-23%), H-3→L+1 (46%), H-1→L+2 (11%)                   |
| 44  | 256.4           | 0.0313        | Singlet-A        | H-3→L+2 (90%)                                                   |
| 46  | 255.1           | 0.0005        | Singlet-A        | H-6→L+1 (51%), H-6→L+2 (15%), H-5→L+1 (-19%)                    |
| 48  | 244.7           | 0.021         | Singlet-A        | H-7→LUMO (29%), H-5→L+3 (42%), H-4→L+1 (-12%)                   |
| 49  | 243.1           | 0.0065        | Singlet-A        | H-7→LUMO (-34%), H-5→L+3 (43%)                                  |
| 51  | 239.7           | 0.0386        | Singlet-A        | H-7→LUMO (22%), H-4→L+1 (57%)                                   |
| 55  | 237.7           | 0.1206        | Singlet-A        | H-1→L+4 (-19%), HOMO→L+4 (56%)                                  |
| 56  | 234.6           | 0.0219        | Singlet-A        | H-4→L+2 (62%), H-1→L+4 (-21%)                                   |
| 57  | 229.4           | 0.2309        | Singlet-A        | H-1→L+4 (35%), HOMO→L+4 (19%)                                   |
| 58  | <b>228.5</b>    | <b>0.016</b>  | <b>Singlet-A</b> | <b>H-2→L+4 (92%)</b>                                            |
| 59  | 226.2           | 0.001         | Singlet-A        | H-3→L+3 (79%)                                                   |
| 60  | 224.6           | 0.0002        | Singlet-A        | H-6→L+1 (-22%), H-6→L+2 (72%)                                   |

**Table S3** Calculated transition energies of **Pt-2** at optimized geometry. The lower energy triplet- and the intense singlet-transitions are selected among 60-transitions

| No.       | Wavelength (nm) | Osc. Strength | Symmetry         | Major contribs                                                    |
|-----------|-----------------|---------------|------------------|-------------------------------------------------------------------|
| 1         | 442.6           | 0.0           | Triplet-A        | H-1→LUMO (57%), HOMO→LUMO (-22%)                                  |
| 2         | 413.3           | 0.0           | Triplet-A        | H-1→L+1 (17%), HOMO→LUMO (13%), HOMO→L+1 (37%)                    |
| 3         | 400.2           | 0.0           | Triplet-A        | H-1→LUMO (13%), HOMO→LUMO (58%)                                   |
| 4         | 373.9           | 0.0275        | Singlet-A        | H-1→LUMO (-18%), HOMO→LUMO (77%)                                  |
| 8         | 345.4           | 0.0785        | Singlet-A        | H-1→LUMO (73%), HOMO→LUMO (20%)                                   |
| <b>9</b>  | <b>343.1</b>    | <b>0.0033</b> | <b>Singlet-A</b> | <b>H-2→LUMO (99%)</b>                                             |
| 15        | 315.6           | 0.0446        | Singlet-A        | HOMO→L+1 (90%)                                                    |
| 17        | 310.3           | 0.0634        | Singlet-A        | H-3→LUMO (62%), H-1→L+2 (-11%)                                    |
| 21        | 303.2           | 0.0171        | Singlet-A        | HOMO→L+2 (87%)                                                    |
| <b>24</b> | <b>299.8</b>    | <b>0.0002</b> | <b>Singlet-A</b> | <b>H-2→L+1 (87%), H-2→L+2 (11%)</b>                               |
| 25        | 292.3           | 0.0866        | Singlet-A        | H-1→L+1 (79%)                                                     |
| 27        | 286.6           | 0.0002        | Singlet-A        | H-11→LUMO (13%), H-4→LUMO (81%)                                   |
| 30        | 284.8           | 0.0011        | Singlet-A        | H-11→LUMO (-29%), H-6→LUMO (11%), H-5→LUMO (42%)                  |
| 31        | 284.6           | 0.0438        | Singlet-A        | H-10→LUMO (32%), H-1→L+2 (43%)                                    |
| 33        | 284.2           | 0.0007        | Singlet-A        | H-11→LUMO (38%), H-5→LUMO (42%)                                   |
| <b>36</b> | <b>280.1</b>    | <b>0.0001</b> | <b>Singlet-A</b> | <b>H-2→L+1 (-12%), H-2→L+2 (81%)</b>                              |
| 38        | 279.0           | 0.0022        | Singlet-A        | H-7→LUMO (-12%), H-6→LUMO (70%), H-5→LUMO (-11%)                  |
| 40        | 277.1           | 0.0095        | Singlet-A        | H-7→LUMO (79%), H-6→LUMO (13%)                                    |
| 41        | 276.9           | 0.0002        | Singlet-A        | H-11→LUMO (10%), HOMO→L+7 (65%)                                   |
| 46        | 273.5           | 0.0934        | Singlet-A        | H-10→LUMO (-14%), H-9→LUMO (-15%), H-3→L+1 (24%), H-1→L+2 (18%)   |
| 48        | 270.9           | 0.0052        | Singlet-A        | H-8→LUMO (86%)                                                    |
| 49        | 270.8           | 0.0015        | Singlet-A        | H-10→LUMO (-10%), H-9→LUMO (75%)                                  |
| 50        | 268.8           | 0.0244        | Singlet-A        | H-3→L+1 (-17%), H-2→L+7 (64%)                                     |
| 51        | 267.9           | 0.0001        | Singlet-A        | H-1→L+7 (63%)                                                     |
| 52        | 267.7           | 0.0662        | Singlet-A        | H-12→LUMO (23%), H-10→LUMO (-12%), H-3→L+1 (-22%)                 |
| 53        | 265.8           | 0.0459        | Singlet-A        | H-12→LUMO (29%), H-12→L+1 (15%), H-10→LUMO (11%), H-3→L+1 (13%)   |
| 54        | 265.3           | 0.1959        | Singlet-A        | H-3→L+2 (-33%), HOMO→L+3 (50%)                                    |
| 55        | 262.5           | 0.0003        | Singlet-A        | H-12→LUMO (-30%), H-11→L+1 (51%), H-11→L+2 (10%)                  |
| 56        | 262.3           | 0.1593        | Singlet-A        | H-3→L+2 (55%), HOMO→L+3 (33%)                                     |
| 57        | 261.8           | 0.0006        | Singlet-A        | H-12→LUMO (-12%), H-12→L+1 (47%), H-12→L+2 (12%), H-11→L+1 (-18%) |
| 58        | 260.2           | 0.042         | Singlet-A        | H-1→L+3 (58%)                                                     |
| 59        | 260.0           | 0.0025        | Singlet-A        | HOMO→L+4 (87%)                                                    |
| 60        | 258.2           | 0.0001        | Singlet-A        | H-4→L+1 (87%)                                                     |

**Table S3** Calculated transition energies of **Pt-3** at optimized geometry. The lower energy triplet- and the intense singlet-transitions are selected among 60-transitions

| No.       | Wavelength (nm) | Osc. Strength | Symmetry         | Major contribs                                   |
|-----------|-----------------|---------------|------------------|--------------------------------------------------|
| 1         | 442.6           | 0.0           | Triplet-A        | H-1→LUMO (57%), HOMO→LUMO (-22%)                 |
| 2         | 413.3           | 0.0           | Triplet-A        | H-1→L+1 (17%), HOMO→LUMO (13%), HOMO→L+1 (37%)   |
| 3         | 400.2           | 0.0           | Triplet-A        | H-1→LUMO (13%), HOMO→LUMO (58%)                  |
| 4         | 373.9           | 0.0275        | Singlet-A        | H-1→LUMO (-18%), HOMO→LUMO (77%)                 |
| 8         | 345.4           | 0.0785        | Singlet-A        | H-1→LUMO (73%), HOMO→LUMO (20%)                  |
| <b>9</b>  | <b>343.1</b>    | <b>0.0033</b> | <b>Singlet-A</b> | <b>H-2→LUMO (99%)</b>                            |
| 15        | 315.6           | 0.0446        | Singlet-A        | HOMO→L+1 (90%)                                   |
| 17        | 310.3           | 0.0634        | Singlet-A        | H-3→LUMO (62%), H-1→L+2 (-11%)                   |
| 21        | 303.2           | 0.0171        | Singlet-A        | HOMO→L+2 (87%)                                   |
| <b>24</b> | <b>299.8</b>    | <b>0.0002</b> | <b>Singlet-A</b> | <b>H-2→L+1 (87%), H-2→L+2 (11%)</b>              |
| 25        | 292.3           | 0.0866        | Singlet-A        | H-1→L+1 (79%)                                    |
| 27        | 286.6           | 0.0002        | Singlet-A        | H-11→LUMO (13%), H-4→LUMO (81%)                  |
| 30        | 284.8           | 0.0011        | Singlet-A        | H-11→LUMO (-29%), H-6→LUMO (11%), H-5→LUMO (42%) |
| 31        | 284.6           | 0.0438        | Singlet-A        | H-10→LUMO (32%), H-1→L+2 (43%)                   |
| 33        | 284.2           | 0.0007        | Singlet-A        | H-11→LUMO (38%), H-5→LUMO (42%)                  |

|    |       |        |           |                                                                   |
|----|-------|--------|-----------|-------------------------------------------------------------------|
| 36 | 280.1 | 0.0001 | Singlet-A | H-2→L+1 (-12%), H-2→L+2 (81%)                                     |
| 38 | 279.0 | 0.0022 | Singlet-A | H-7→LUMO (-12%), H-6→LUMO (70%), H-5→LUMO (-11%)                  |
| 40 | 277.1 | 0.0095 | Singlet-A | H-7→LUMO (79%), H-6→LUMO (13%)                                    |
| 41 | 276.9 | 0.0002 | Singlet-A | H-11→LUMO (10%), HOMO→L+7 (65%)                                   |
| 46 | 273.5 | 0.0934 | Singlet-A | H-10→LUMO (-14%), H-9→LUMO (-15%), H-3→L+1 (24%), H-1→L+2 (18%)   |
| 48 | 270.9 | 0.0052 | Singlet-A | H-8→LUMO (86%)                                                    |
| 49 | 270.8 | 0.0015 | Singlet-A | H-10→LUMO (-10%), H-9→LUMO (75%)                                  |
| 50 | 268.8 | 0.0244 | Singlet-A | H-3→L+1 (-17%), H-2→L+7 (64%)                                     |
| 51 | 267.9 | 0.0001 | Singlet-A | H-1→L+7 (63%)                                                     |
| 52 | 267.7 | 0.0662 | Singlet-A | H-12→LUMO (23%), H-10→LUMO (-12%), H-3→L+1 (-22%)                 |
| 53 | 265.8 | 0.0459 | Singlet-A | H-12→LUMO (29%), H-12→L+1 (15%), H-10→LUMO (11%), H-3→L+1 (13%)   |
| 54 | 265.3 | 0.1959 | Singlet-A | H-3→L+2 (-33%), HOMO→L+3 (50%)                                    |
| 55 | 262.5 | 0.0003 | Singlet-A | H-12→LUMO (-30%), H-11→L+1 (51%), H-11→L+2 (10%)                  |
| 56 | 262.3 | 0.1593 | Singlet-A | H-3→L+2 (55%), HOMO→L+3 (33%)                                     |
| 57 | 261.8 | 0.0006 | Singlet-A | H-12→LUMO (-12%), H-12→L+1 (47%), H-12→L+2 (12%), H-11→L+1 (-18%) |
| 58 | 260.2 | 0.042  | Singlet-A | H-1→L+3 (58%)                                                     |
| 59 | 260.0 | 0.0025 | Singlet-A | HOMO→L+4 (87%)                                                    |
| 60 | 258.2 | 0.0001 | Singlet-A | H-4→L+1 (87%)                                                     |

---
